# Supplementary material for: Reduced graphene oxide-decorated CdS/ZnO nanocomposites for photoreduction of hexavalent chromium and photodegradation of methylene blue
Source: Royal Society of Chemistry journal article supplement (doi:10.1039/d1dt02192c), 2021-01-01

## **Supporting Information**

Reduced graphene oxide decorated CdS/ZnO nanocomposites for photoreduction of hexavalent chromium and photodegradation of methylene blue

Ajay Lathe<sup>1</sup> and Anil M. Palve<sup>1\*</sup>

Department of Chemistry, Mahatma Phule Arts, Science and Commerce College, Panvel, Navi-Mumbai, Maharashtra-410206, INDIA

\*Author to whom correspondence should be addressed

E-mail address: [palve\\_anil@yahoo.com](mailto:palve_anil@yahoo.com)

**Data of CdI<sub>2</sub>(benztsczH)<sub>2</sub> complex (Spectroscopic and physical):**

Melting Point: 206 °C, (Yield: 86.19 %), Elemental analysis (%) found (calculated): Cd: 20.60 (20.74), C: 35.35 (35.46), H: 3.29 (3.34), N: 15.70 (15.51), S: 11.69 (11.83), Cl: 13.02 (13.08). I.R. (cm<sup>-1</sup>): 3431, 3271 (ν<sub>NH<sub>2</sub></sub> asym and sym), 3190 (ν<sub>NH</sub>), 1575 (ν<sub>C=N</sub>), 848 (ν<sub>C=S</sub>). N.M.R. (δ in ppm): <sup>1</sup>H: 7.36-8.19 (s, 2H, -NH<sub>2</sub>; + m, 6H, C<sub>6</sub>H<sub>5</sub>-CH=); 11.42 (s, 1H, -NH-); <sup>13</sup>C (δ in ppm): 178.23 (>C=S), 142.92 (>C=N-), 134.57, 130.32, 129.10, 127.76 (aromatic carbons)

**Figure S1:** EDX of (a) ZnO/rGO, (b) ZnO/CdS and (c) CdS/ZnO/rGO nanocomposites.

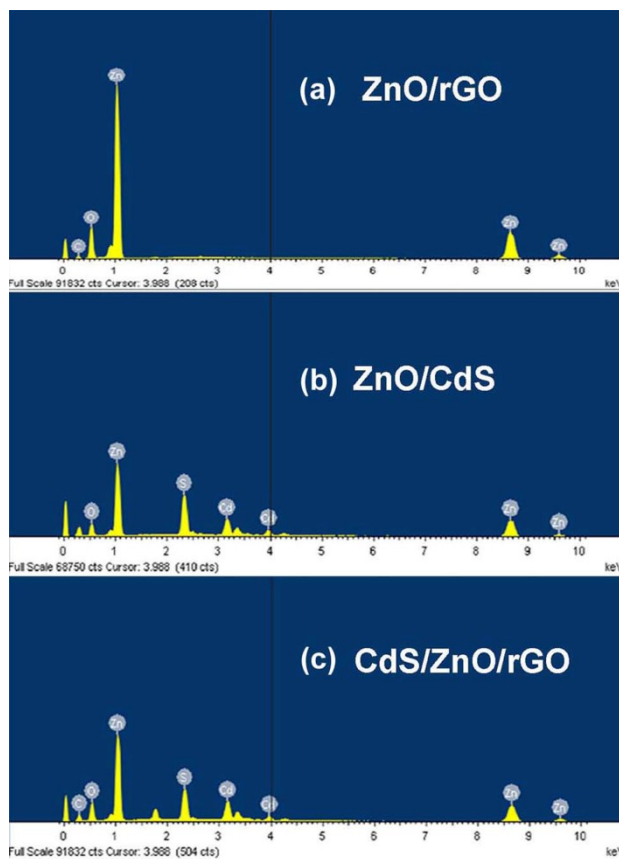

**Figure S2:** Photograph of the reduction of (a) Cr(VI) solution to (b) Cr(III) solution and (c) formation of a green precipitate of Cr(OH)<sub>3</sub> after adding saturated NaOH solution to (b) solution.

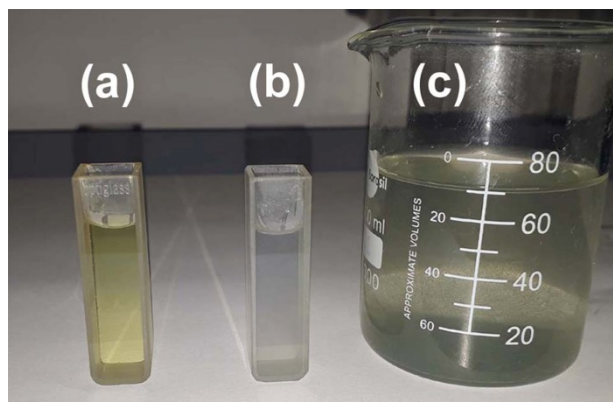

**Figure S3:** UV-Vis absorption spectra of MB photoreduction by EDTA-2Na as a hole scavenger.

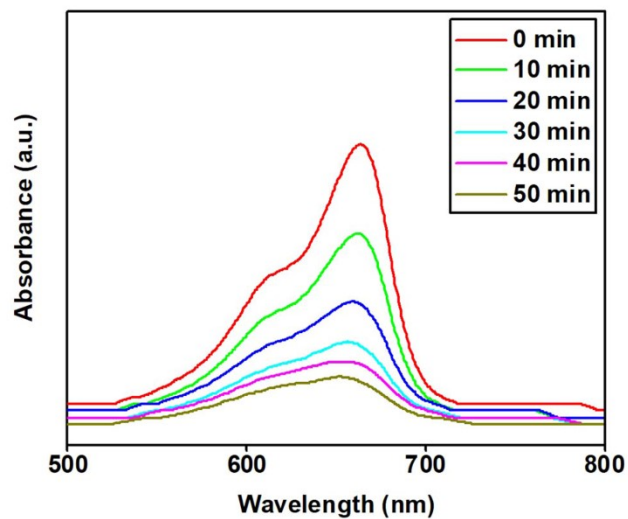

**Figure S4:** UV-Vis absorption spectra of MB photoreduction by  $H_2O_2$  as an electron scavenger.

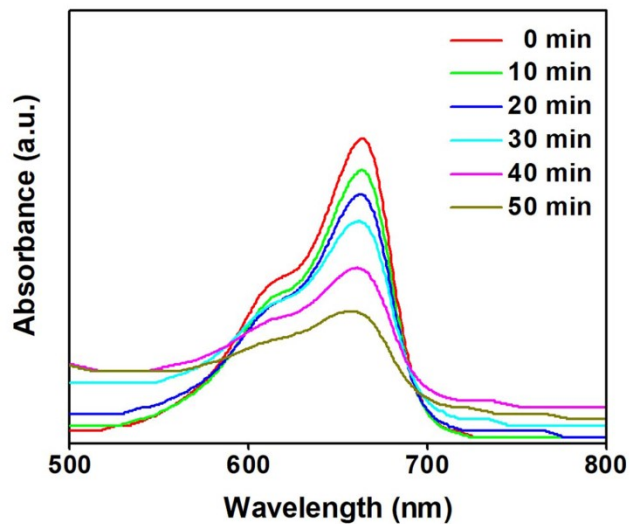

**Figure S5:** UV-Vis absorption spectra of MB photoreduction by DMSO used a hydroxyl radical scavenger

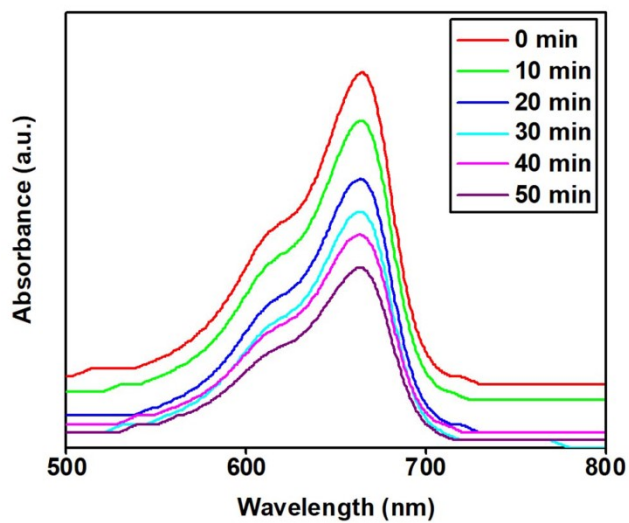

**Figure S6:** UV-Vis absorption spectra of MB photoreduction by ascorbic acid as a superoxide anion radical scavenger.

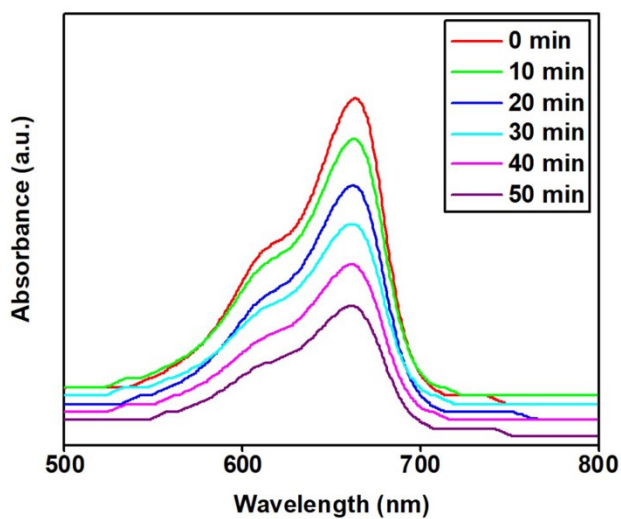

**Figure S7:** CV of the pure buffer (10 mL) is compared with the CV of 2 mg and 4 mg of the CdS/ZnO/rGO dispersed in 10 mL of the buffer pH of the buffer is 5.8.

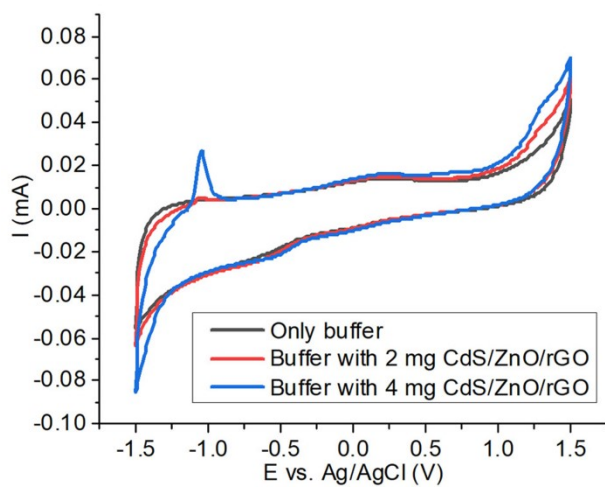

Supplement: d1dt02192c7.pdf [file d1dt02192c7.pdf]
