# Supplementary figures and images for: Reduced graphene oxide-decorated CdS/ZnO nanocomposites for photoreduction of hexavalent chromium and photodegradation of methylene blue
Source: Royal Society of Chemistry journal article supplement (doi:10.1039/d1dt02192c), 2021-01-01

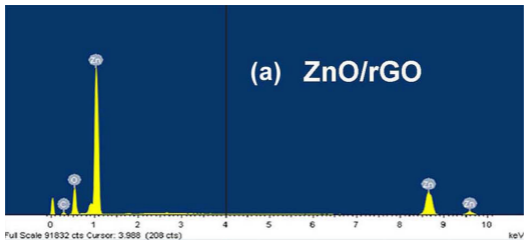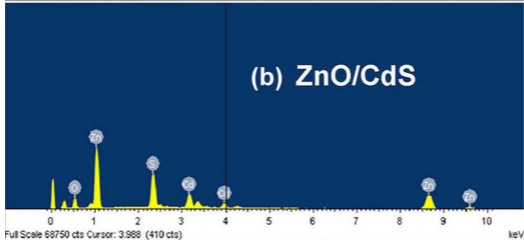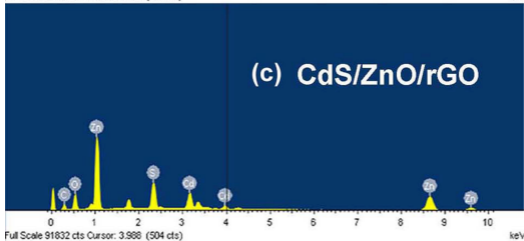

Supplement: d1dt02192c2.pdf [file d1dt02192c2.pdf]

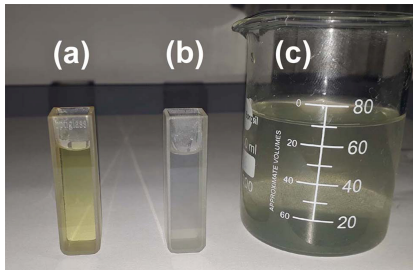

Supplement: d1dt02192c3.pdf [file d1dt02192c3.pdf]

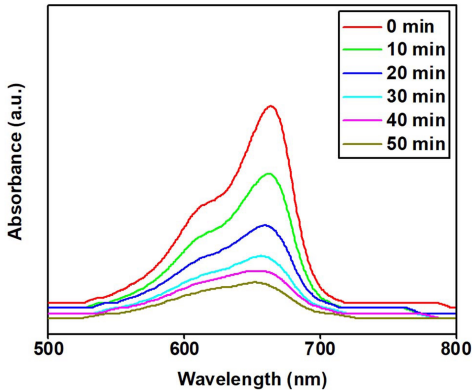

Supplement: d1dt02192c4.pdf [file d1dt02192c4.pdf]

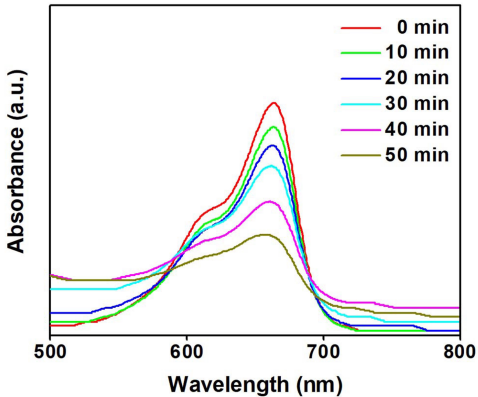

Supplement: d1dt02192c5.pdf [file d1dt02192c5.pdf]

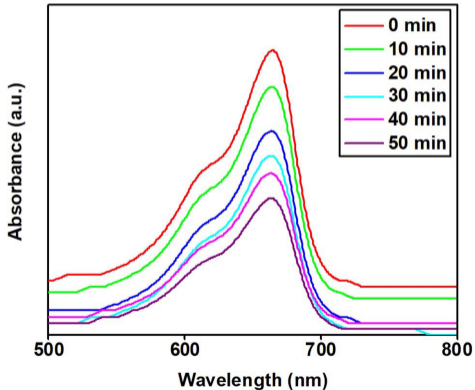

Supplement: d1dt02192c6.pdf [file d1dt02192c6.pdf]
